# Supplementary material for: Prognostic indicators and outcomes of hospitalised COVID-19 patients with neurological disease: An individual patient data meta-analysis
Source: PubMed Central journal article supplement (PMC9162376; doi:10.1371/journal.pone.0263595), 2022-06-02
Supplement: pone.0263595.s003.pdf [file pone.0263595.s003.pdf]

## **Supplementary appendix S2 – Data extraction tool, dictionary, and case definitions**

**Prognostic indicators and outcomes of hospitalised COVID-19 patients with neurological disease: a systematic review and individual patient data meta-analysis**

### **Contents**

**Section 1:** Data extraction tool

**Section 2:** Dictionary for data extraction tool

**Section 3:** Case definitions

**3.1:** COVID-19 case definitions

**3.2:** Neurological case definitions

**3.3:** Neurological COVID-19 association

## Section 1: Data extraction tool

### Clinician details

Name of responsible clinician  
 Role and specialty of responsible clinician  
 Hospital  
 Town/City  
 Country

### Patient record

### Admission details

Date of patient's hospital admission (dd/mm/yy)

### Patient demographics

Age  
 Sex  
 Ethnicity  
 Pregnant

If 'YES', gestational weeks:

Patient recruited to other research studies?

### Comorbidities

Hypertension  
 Chronic cardiac disease  
 Atrial fibrillation  
 Diabetes mellitus  
 Obesity  
 HIV or other immunocompromise  
 Malignancy  
 Dementia  
 History of previous stroke  
 Other chronic neurological disorder  
 Other comorbidity  
 If 'YES', please give details of other comorbidity:  
 Smoker/ smoking history  
 History of excessive alcohol consumption

### Medication pre-admission

Anti-hypertensives  
 Anti-platelets  
 Anti-coagulation  
 Immunomodulatory therapy – oral steroids or other immunosuppressant agents  
 Other pre-admission medication

### COVID-19: Systemic Infection

**Did the patient have suspected, probable or confirmed COVID-19? (See Tab 3 Table 1)**

If 'suspected' due to contact with case, indicate date of contact if known (dd/mm/yy)

**COVID-19 disease severity (See Tab 3 Table 2)**

**Date of COVID-19 symptom onset (dd/mm/yy)**

**Date of COVID-19 symptom resolution (dd/mm/yy) - if symptoms ongoing, leave blank**

*Clinical features of COVID-19 infection*

fever  
 lethargy  
 myalgia  
 coryza  
 loss of smell (anosmia)  
 loss of taste (ageusia)

|                     |  |
|---------------------|--|
| sore throat         |  |
| cough               |  |
| chest pain          |  |
| shortness of breath |  |
| diarrhoea           |  |
| abdominal pain      |  |

**Blood results - please indicate units**

|                                   |  |
|-----------------------------------|--|
| Initial haemoglobin               |  |
| Initial lymphocyte count          |  |
| Lowest lymphocyte count           |  |
| Initial neutrophil count          |  |
| Initial platelet count            |  |
| Initial CRP                       |  |
| Initial D-dimer                   |  |
| Highest D-dimer                   |  |
| Initial ferritin                  |  |
| Initial creatinine                |  |
| Initial LDH                       |  |
| Initial Prothrombin time          |  |
| Blood culture performed?          |  |
| If YES, select result:            |  |
| HIV                               |  |
| Malaria screen (RDT/film/smear)   |  |
| Scrub typhus serology             |  |
| Japanese encephalitis serology    |  |
| Dengue serology                   |  |
| Other non-COVID-19 blood results: |  |

**Chest Imaging**

|                                       |  |
|---------------------------------------|--|
| <b>Chest X-ray performed?</b>         |  |
| If 'YES', Abnormalities?              |  |
| date performed [dd/mm/yy]:            |  |
| <b>Chest CT performed?</b>            |  |
| If 'YES', Evidence of pneumonia?      |  |
| Evidence of ground glass abnormality? |  |
| Evidence of pulmonary embolism?       |  |
| date performed [dd/mm/yy]:            |  |

**COVID-19: Laboratory testing**

|                                                                                           |  |
|-------------------------------------------------------------------------------------------|--|
| <b>Laboratory-confirmed SARS-2 infection</b>                                              |  |
| <b>PCR positive - respiratory specimen</b>                                                |  |
| date of sample collection (dd/mm/yy)                                                      |  |
| <b>What was the RT-PCR Cycle threshold (Ct) of the first respiratory specimen tested?</b> |  |
| <b>PCR positive - blood</b>                                                               |  |
| date of sample collection (dd/mm/yy)                                                      |  |
| <b>PCR positive - Cerebrospinal fluid</b>                                                 |  |
| date of sample collection (dd/mm/yy)                                                      |  |
| <b>IgM positive - serum</b>                                                               |  |
| date of sample collection (dd/mm/yy)                                                      |  |
| <b>IgM positive - cerebrospinal fluid</b>                                                 |  |
| date of sample collection (dd/mm/yy)                                                      |  |
| <b>IgG positive - serum</b>                                                               |  |

|                                                                                                                                                                                |  |
|--------------------------------------------------------------------------------------------------------------------------------------------------------------------------------|--|
| date of sample collection (dd/mm/yy)                                                                                                                                           |  |
| <b>IgG positive - cerebrospinal fluid</b>                                                                                                                                      |  |
| date of sample collection (dd/mm/yy)                                                                                                                                           |  |
| If other method, please specify                                                                                                                                                |  |
| date of sample collection (dd/mm/yy)                                                                                                                                           |  |
| <b>Additional respiratory pathogen testing</b>                                                                                                                                 |  |
| PCR Influenza                                                                                                                                                                  |  |
| Positive test for other respiratory pathogen                                                                                                                                   |  |
| If YES, describe pathogen, test and sample:                                                                                                                                    |  |
| <b>Neurological syndrome</b>                                                                                                                                                   |  |
| <b>Date of onset of neurological features (dd/mm/yy)</b>                                                                                                                       |  |
| <b>Neurological syndrome (select; see Tab 4 for Neuro Case Definitions)</b>                                                                                                    |  |
| <b>Specific neurological syndrome:</b>                                                                                                                                         |  |
| If 'Encephalitis' OR 'Encephalopathy' (includes delirium or coma), select syndrome:                                                                                            |  |
| If 'Other' or additional details, describe:                                                                                                                                    |  |
| If 'Guillain Barré Syndrome', select syndrome:                                                                                                                                 |  |
| If 'Other' or additional details, describe:                                                                                                                                    |  |
| If 'Cerebrovascular event', select:                                                                                                                                            |  |
| If 'Other' or additional details, describe:                                                                                                                                    |  |
| If 'Other neurological syndrome', give details:                                                                                                                                |  |
| <b>Level of evidence - neurological diagnosis:</b>                                                                                                                             |  |
| If 'Meningitis':                                                                                                                                                               |  |
| If 'Encephalitis':                                                                                                                                                             |  |
| If 'Acute Disseminated Encephalomyelitis (ADEM)':                                                                                                                              |  |
| If 'Myelitis':                                                                                                                                                                 |  |
| If 'Guillain Barré Syndrome':                                                                                                                                                  |  |
| If 'Cerebrovascular event - Vasculitis':                                                                                                                                       |  |
| <b>Level of evidence - association between neurological disease and COVID-19:</b>                                                                                              |  |
| See Tab 4 Neuro Case Definitions                                                                                                                                               |  |
| Based on Tab 5, Table 1, indicate if the <b>association between SARS-CoV-2 infection and neurological disease</b> is confirmed / strong, probable, possible, or not described: |  |
| If 'Not described in Tab 5 Table 1', give details of evidence for association:                                                                                                 |  |
| <b>History of pre-existing neurological disorder?</b>                                                                                                                          |  |
| if yes: give details (estimated data of diagnosis; neurological disorder)                                                                                                      |  |
| <b>Neurological symptoms</b>                                                                                                                                                   |  |
| Headache                                                                                                                                                                       |  |
| Reduced conscious level                                                                                                                                                        |  |
| Confusion                                                                                                                                                                      |  |
| Delirium                                                                                                                                                                       |  |
| If Disturbance in attention and awareness?                                                                                                                                     |  |
| 'YES',                                                                                                                                                                         |  |
| Change from baseline that developed rapidly and fluctuates during the day?                                                                                                     |  |
| Additional disturbance in cognition?                                                                                                                                           |  |
| If 'YES' to additional disturbance in cognition, give details:                                                                                                                 |  |
| Behavioural change                                                                                                                                                             |  |
| Seizure(s)                                                                                                                                                                     |  |
| if 'YES': focal, generalised, or other?                                                                                                                                        |  |
| If 'Other', give details:                                                                                                                                                      |  |
| Visual disturbance                                                                                                                                                             |  |
| if 'YES': visual field defect, diplopia, reduced acuity, or other?                                                                                                             |  |
| If 'Other', give details:                                                                                                                                                      |  |
| Photophobia                                                                                                                                                                    |  |
| If other neurological symptom(s), give details:                                                                                                                                |  |

**Neurological signs**

AVPU  
Glasgow Coma Score (/15) (lowest score recorded during admission)  
    Eye opening  
    Verbal response  
    Motor response  
Neck stiffness  
Disorientation  
Witnessed seizures  
New onset movement disorder  
    if 'YES': ataxia, chorea, tremor, myoclonus, bradykenesia or other?  
    If 'Other / combination of features', give details:  
Cranial neuropathy  
    if yes: describe here  
Peripheral neuropathy  
    if yes: describe here  
Limb weakness  
    if yes: describe here  
Sensory abnormality  
    if yes: describe here  
Dysphagia  
Dysphasia  
    if yes: describe here

|  |
|--|
|  |
|  |
|  |
|  |
|  |
|  |
|  |
|  |
|  |
|  |
|  |
|  |
|  |
|  |
|  |
|  |
|  |
|  |
|  |

**Neurological Investigations**

**CSF results**

Lumbar puncture performed?  
If YES, date of lumbar puncture (dd/mm/yy)  
    CSF opening pressure [cm CSF/water]  
    CSF total white cell count [per μl or cumm or mm³]  
    CSF neutrophil/polymorph count  
    Units for neutrophil/polymorph count  
    CSF lymphocyte/mononuclear cell count  
    Units for lymphocyte/mononuclear cell count  
    CSF red blood cells [per μl or cumm or mm³]  
    CSF protein  
    Units for protein  
    CSF glucose  
    Paired blood glucose  
    Units for glucose  
    CSF albumin [g/L]  
    CSF oligoclonal bands  
Other NON-MICROBIOLOGICAL CSF results

|  |
|--|
|  |
|  |
|  |
|  |
|  |
|  |
|  |
|  |
|  |
|  |
|  |
|  |
|  |
|  |
|  |
|  |
|  |
|  |
|  |
|  |

**Microbiological CSF results**

CSF Gram stain (record result if performed)  
CSF bacterial culture (record result if performed)  
CSF Herpes Simplex Virus PCR (HSV1 or HSV2 or combined)  
CSF Varicella Zoster Virus PCR  
CSF Enterovirus PCR  
CSF TB PCR  
CSF Other pathogen test  
    If YES, describe:

|  |
|--|
|  |
|  |
|  |
|  |
|  |
|  |
|  |
|  |
|  |
|  |

**Neuroimaging**





# 1 Section 2: Dictionary for data extraction tool

2

| Variable name       | Values           |                                    |                              |                                                               |                                    |                                   |                                                          |                                    |                   |            |
|---------------------|------------------|------------------------------------|------------------------------|---------------------------------------------------------------|------------------------------------|-----------------------------------|----------------------------------------------------------|------------------------------------|-------------------|------------|
| clinician_name      |                  |                                    |                              |                                                               |                                    |                                   |                                                          |                                    |                   |            |
| clinician_role      |                  |                                    |                              |                                                               |                                    |                                   |                                                          |                                    |                   |            |
| centre              |                  |                                    |                              |                                                               |                                    |                                   |                                                          |                                    |                   |            |
| location_city       |                  |                                    |                              |                                                               |                                    |                                   |                                                          |                                    |                   |            |
| location_country    |                  |                                    |                              |                                                               |                                    |                                   |                                                          |                                    |                   |            |
| date_adm_hosp       |                  |                                    |                              |                                                               |                                    |                                   |                                                          |                                    |                   |            |
| age                 |                  |                                    |                              |                                                               |                                    |                                   |                                                          |                                    |                   |            |
| sex                 | 0 - Male         | 1 - Female                         | 2 - Other                    | 3 - Unknown                                                   |                                    |                                   |                                                          |                                    |                   |            |
| ethnic              | 1 - Arab         | 2 - Black                          | 3 - East Asian               | 4 - South Asian                                               | 5 - West Asian                     | 6 - Latin American                | 7 - White                                                | 8 - Aboriginal                     | 9 - First Nations | 10 - Other |
| pregnancy           | 1 - Yes          | 0 - No                             | 2 - Unknown                  |                                                               |                                    |                                   |                                                          |                                    |                   |            |
| weeks_pregnant      |                  |                                    |                              |                                                               |                                    |                                   |                                                          |                                    |                   |            |
| other_studies       | 0 - No           | 1 - ISARIC CCP                     | 2 - WHO-SOLIDARITY           | 3 - Other                                                     |                                    |                                   |                                                          |                                    |                   |            |
| comorb_hypertension | 1 - Yes          | 0 - No                             | 2 - Unknown                  |                                                               |                                    |                                   |                                                          |                                    |                   |            |
| comorb_ccd          | 1 - Yes          | 0 - No                             | 2 - Unknown                  |                                                               |                                    |                                   |                                                          |                                    |                   |            |
| comorb_af           | 1 - Yes          | 0 - No                             | 2 - Unknown                  |                                                               |                                    |                                   |                                                          |                                    |                   |            |
| comorb_diabetes     | 1 - Yes          | 0 - No                             | 2 - Unknown                  |                                                               |                                    |                                   |                                                          |                                    |                   |            |
| comorb_obesity      | 1 - Yes          | 0 - No                             | 2 - Unknown                  |                                                               |                                    |                                   |                                                          |                                    |                   |            |
| comorb_hiv          | 1 - Yes          | 0 - No                             | 2 - Unknown                  |                                                               |                                    |                                   |                                                          |                                    |                   |            |
| comorb_malignancy   | 1 - Yes          | 0 - No                             | 2 - Unknown                  |                                                               |                                    |                                   |                                                          |                                    |                   |            |
| comorb_dementia     | 1 - Yes          | 0 - No                             | 2 - Unknown                  |                                                               |                                    |                                   |                                                          |                                    |                   |            |
| comorb_stroke       | 1 - Yes          | 0 - No                             | 2 - Unknown                  |                                                               |                                    |                                   |                                                          |                                    |                   |            |
| comorb_chronicneuro | 1 - Yes          | 0 - No                             | 2 - Unknown                  |                                                               |                                    |                                   |                                                          |                                    |                   |            |
| comorb_other        | 1 - Yes          | 0 - No                             | 2 - Unknown                  |                                                               |                                    |                                   |                                                          |                                    |                   |            |
| comorb_detail       |                  |                                    |                              |                                                               |                                    |                                   |                                                          |                                    |                   |            |
| smoke               | 1 - Yes          | 0 - No                             | 2 - Unknown                  |                                                               |                                    |                                   |                                                          |                                    |                   |            |
| alcohol             | 1 - Yes          | 0 - No                             | 2 - Unknown                  |                                                               |                                    |                                   |                                                          |                                    |                   |            |
| anti_htn            | 1 - Yes          | 0 - No                             | 2 - Unknown                  |                                                               |                                    |                                   |                                                          |                                    |                   |            |
| anti_plat           | 1 - Yes          | 0 - No                             | 2 - Unknown                  |                                                               |                                    |                                   |                                                          |                                    |                   |            |
| anti_coag           | 1 - Yes          | 0 - No                             | 2 - Unknown                  |                                                               |                                    |                                   |                                                          |                                    |                   |            |
| immunotherapy       | 1 - Yes          | 0 - No                             | 2 - Unknown                  |                                                               |                                    |                                   |                                                          |                                    |                   |            |
| comorb_other_detail |                  |                                    |                              |                                                               |                                    |                                   |                                                          |                                    |                   |            |
| covid_diag_label    | 1 - Confirmed    | 2 - Probable - test inconclusive   | 3 - Probable - test not done | 4 - Probable - PCR negative, supportive blood tests/radiology | 5 - Suspected - local transmission | 6 - Suspected - contact with case | 7 - Suspected - severe and no other aetiology identified | 8 - Suspected - clinical suspicion |                   |            |
| date_cov_contact    |                  |                                    |                              |                                                               |                                    |                                   |                                                          |                                    |                   |            |
| covid-severity      | 1 - Asymptomatic | 2 - Mild - no hypoxia or pneumonia | 3 - Moderate - pneumonia     | 4 - Severe - severe pneumonia                                 | 5 - Critical - ARDS                | 6 - Critical - sepsis             | 7 - Critical - septic shock                              | 8 - Unknown                        |                   |            |
| date_cov_sym_onset  |                  |                                    |                              |                                                               |                                    |                                   |                                                          |                                    |                   |            |



|                           |                        |                               |                         |             |
|---------------------------|------------------------|-------------------------------|-------------------------|-------------|
| date_cov_sym_resolution   |                        |                               |                         |             |
| fever_hist                | 1 - Yes                | 0 - No                        | 2 - Unknown             |             |
| lethargy                  | 1 - Yes                | 0 - No                        | 2 - Unknown             |             |
| myalgia                   | 1 - Yes                | 0 - No                        | 2 - Unknown             |             |
| coryza                    | 1 - Yes                | 0 - No                        | 2 - Unknown             |             |
| anosmia                   | 1 - Yes                | 0 - No                        | 2 - Unknown             |             |
| loss_of_taste             | 1 - Yes                | 0 - No                        | 2 - Unknown             |             |
| sore_thr                  | 1 - Yes                | 0 - No                        | 2 - Unknown             |             |
| cough                     | 1 - Yes                | 0 - No                        | 2 - Unknown             |             |
| chest_pain                | 1 - Yes                | 0 - No                        | 2 - Unknown             |             |
| sob                       | 1 - Yes                | 0 - No                        | 2 - Unknown             |             |
| diarrhoea                 | 1 - Yes                | 0 - No                        | 2 - Unknown             |             |
| abdo_pain                 | 1 - Yes                | 0 - No                        | 2 - Unknown             |             |
| Hb                        |                        |                               |                         |             |
| lymphocyte                |                        |                               |                         |             |
| lowest_lymphocyte         |                        |                               |                         |             |
| neut                      |                        |                               |                         |             |
| plat                      |                        |                               |                         |             |
| CRP                       |                        |                               |                         |             |
| d_dimer                   |                        |                               |                         |             |
| highest_d_dimer           |                        |                               |                         |             |
| ferritin                  |                        |                               |                         |             |
| creat                     |                        |                               |                         |             |
| LDH                       |                        |                               |                         |             |
| ptt                       |                        |                               |                         |             |
| blood_culture             | 1 - Yes                | 0 - No                        | 2 - Unknown             |             |
| blood_culture_result      | 0 - Negative           | 1 - Positive -<br>bacteraemia | 2 - Positive -<br>other | 3 - Unknown |
| HIV                       | 0 - Negative           | 1 - Positive                  | 2 - Not tested          |             |
| Malaria                   | 0 - Negative           | 1 - Positive                  | 2 - Not tested          |             |
| scrub_t                   | 0 - Negative           | 1 - Positive                  | 2 - Not tested          |             |
| JE                        | 0 - Negative           | 1 - Positive                  | 2 - Not tested          |             |
| denv                      | 0 - Negative           | 1 - Positive                  | 2 - Not tested          |             |
| other_path_results        |                        |                               |                         |             |
| cxr                       | 1 - Yes                | 0 - No                        |                         |             |
| cxr_abnormal              | 1 - Yes,<br>unilateral | 2 - Yes, bilateral            | 0 - No, normal          | 3 - Unknown |
| cxr_date                  |                        |                               |                         |             |
| chest_ct                  | 1 - Yes                | 0 - No                        |                         |             |
| ct_pneumonia              | 1 - Yes,<br>unilateral | 2 - Yes, bilateral            | 0 - No                  | 3 - Unknown |
| ct_gr_glass               | 1 - Yes,<br>unilateral | 2 - Yes, bilateral            | 0 - No                  | 3 - Unknown |
| ct_pulm_emb               | 1 - Yes,<br>unilateral | 2 - Yes, bilateral            | 0 - No                  | 3 - Unknown |
| SARS2_infection_confirmed | 1 - Yes                | 0 - No                        |                         |             |
| PCR_resp                  | 1 - Yes                | 0 - No                        | 2 - Not tested          |             |
| PCR_resp_date             |                        |                               |                         |             |
| PCR_Ct                    |                        |                               |                         |             |

|                               |                                        |                                                                       |                                      |                                                         |                                               |                                            |                                      |                                        |              |                            |                                      |  |  |  |  |  |  |  |  |  |  |
|-------------------------------|----------------------------------------|-----------------------------------------------------------------------|--------------------------------------|---------------------------------------------------------|-----------------------------------------------|--------------------------------------------|--------------------------------------|----------------------------------------|--------------|----------------------------|--------------------------------------|--|--|--|--|--|--|--|--|--|--|
| PCR_blood                     | 1 - Yes                                | 0 - No                                                                | 2 - Not tested                       |                                                         |                                               |                                            |                                      |                                        |              |                            |                                      |  |  |  |  |  |  |  |  |  |  |
| PCR_blood_date                |                                        |                                                                       |                                      |                                                         |                                               |                                            |                                      |                                        |              |                            |                                      |  |  |  |  |  |  |  |  |  |  |
| PCR_CSF                       | 1 - Yes                                | 0 - No                                                                | 2 - Not tested                       |                                                         |                                               |                                            |                                      |                                        |              |                            |                                      |  |  |  |  |  |  |  |  |  |  |
| PCR_CSF_date                  |                                        |                                                                       |                                      |                                                         |                                               |                                            |                                      |                                        |              |                            |                                      |  |  |  |  |  |  |  |  |  |  |
| IgM_serum                     | 1 - Yes                                | 0 - No                                                                | 2 - Not tested                       |                                                         |                                               |                                            |                                      |                                        |              |                            |                                      |  |  |  |  |  |  |  |  |  |  |
| IgM_serum_date                |                                        |                                                                       |                                      |                                                         |                                               |                                            |                                      |                                        |              |                            |                                      |  |  |  |  |  |  |  |  |  |  |
| IgM_CSF                       | 1 - Yes                                | 0 - No                                                                | 2 - Not tested                       |                                                         |                                               |                                            |                                      |                                        |              |                            |                                      |  |  |  |  |  |  |  |  |  |  |
| IgM_CSF_date                  |                                        |                                                                       |                                      |                                                         |                                               |                                            |                                      |                                        |              |                            |                                      |  |  |  |  |  |  |  |  |  |  |
| IgG_serum                     | 1 - Yes                                | 0 - No                                                                | 2 - Not tested                       |                                                         |                                               |                                            |                                      |                                        |              |                            |                                      |  |  |  |  |  |  |  |  |  |  |
| IgG_serum_date                |                                        |                                                                       |                                      |                                                         |                                               |                                            |                                      |                                        |              |                            |                                      |  |  |  |  |  |  |  |  |  |  |
| IgG_CSF                       | 1 - Yes                                | 0 - No                                                                | 2 - Not tested                       |                                                         |                                               |                                            |                                      |                                        |              |                            |                                      |  |  |  |  |  |  |  |  |  |  |
| IgG_CSF_date                  |                                        |                                                                       |                                      |                                                         |                                               |                                            |                                      |                                        |              |                            |                                      |  |  |  |  |  |  |  |  |  |  |
| SARS2_method_other            |                                        |                                                                       |                                      |                                                         |                                               |                                            |                                      |                                        |              |                            |                                      |  |  |  |  |  |  |  |  |  |  |
| SARS2_method_other_date       |                                        |                                                                       |                                      |                                                         |                                               |                                            |                                      |                                        |              |                            |                                      |  |  |  |  |  |  |  |  |  |  |
| influ_resp                    | 0 - Negative                           | 1 - Positive                                                          | 2 - Not tested                       |                                                         |                                               |                                            |                                      |                                        |              |                            |                                      |  |  |  |  |  |  |  |  |  |  |
| other_resp_path               | 1 - Yes                                | 0 - No                                                                | 2 - Not tested                       |                                                         |                                               |                                            |                                      |                                        |              |                            |                                      |  |  |  |  |  |  |  |  |  |  |
| other_resp_path_descr         |                                        |                                                                       |                                      |                                                         |                                               |                                            |                                      |                                        |              |                            |                                      |  |  |  |  |  |  |  |  |  |  |
| neuro_onset                   |                                        |                                                                       |                                      |                                                         |                                               |                                            |                                      |                                        |              |                            |                                      |  |  |  |  |  |  |  |  |  |  |
| syndrome                      | 1 - Meningitis                         | 2 - Encephalopathy (no CNS inflammation) - including delirium or coma | 3 - Encephalitis                     | 4 - Acute Disseminated Encephalomyelitis (ADEM)         | 5 - Myelitis                                  | 6 - Guillain-Barré syndrome                | 7 - Radiculitis                      | 8 - Peripheral neuropathy              | 9 - Myositis | 10 - Cerebrovascular event | 11 - Other neurological presentation |  |  |  |  |  |  |  |  |  |  |
| syndrome_encephalitis         | 1 - Encephalopathy - delirium          | 2 - Encephalopathy - coma                                             | 3 - Encephalopathy - other           | 4 - Posterior reversible encephalopathy syndrome (PRES) | 5 - Malignant cerebral oedema                 | 6 - Acute Necrotising Encephalopathy (ANE) | 7 - Encephalitis - Other             |                                        |              |                            |                                      |  |  |  |  |  |  |  |  |  |  |
| syndrome_GBS                  | 1 - Classic sensorimotor (all 4 limbs) | 2 - Motor only (all 4 limbs)                                          | 3 - Paraparetic (lower limbs only)   | 4 - Pharyngeal-cervical-brachial weakness               | 5 - Bilateral facial palsy with paraesthesias | 6 - Pure sensory                           | 7 - Miller Fisher syndrome           | 8 - Bickerstaff brainstem encephalitis | 9 - Other    |                            |                                      |  |  |  |  |  |  |  |  |  |  |
| syndrome_GBS_desc             |                                        |                                                                       |                                      |                                                         |                                               |                                            |                                      |                                        |              |                            |                                      |  |  |  |  |  |  |  |  |  |  |
| syndrome_cerebrovascular      | 1 - TIA                                | 2 - Ischaemic stroke - large artery                                   | 3 - Ischaemic stroke - cardioembolic | 4 - Ischaemic stroke - small vessel occlusion           | 5 - Vasculitis                                | 6 - Haemorrhage                            | 7 - Cerebral vein / sinus thrombosis | 8 - Other                              |              |                            |                                      |  |  |  |  |  |  |  |  |  |  |
| syndrome_cerebrovascular_desc |                                        |                                                                       |                                      |                                                         |                                               |                                            |                                      |                                        |              |                            |                                      |  |  |  |  |  |  |  |  |  |  |
| syndrome_other                |                                        |                                                                       |                                      |                                                         |                                               |                                            |                                      |                                        |              |                            |                                      |  |  |  |  |  |  |  |  |  |  |
| evidence_meningitis           | 1 - Meningitis                         | 2 - Possible meningitis                                               | 3 - Meningism                        | 4 - Suspected meningitis                                |                                               |                                            |                                      |                                        |              |                            |                                      |  |  |  |  |  |  |  |  |  |  |
| evidence_encephalitis         | 1 - Encephalitis                       | 2 - Possible encephalitis                                             | 3 - Encephalopathy                   | 4 - Suspected encephalopathy                            |                                               |                                            |                                      |                                        |              |                            |                                      |  |  |  |  |  |  |  |  |  |  |
| evidence_adem                 | 1 - ADEM                               | 2 - Possible ADEM                                                     | 3 - Suspected ADEM                   |                                                         |                                               |                                            |                                      |                                        |              |                            |                                      |  |  |  |  |  |  |  |  |  |  |
| evidence_myelitis             | 1 - Myelitis                           | 2 - Possible myelitis                                                 | 3 - Myelopathy                       | 4 - Suspected myelopathy                                |                                               |                                            |                                      |                                        |              |                            |                                      |  |  |  |  |  |  |  |  |  |  |

|                         |                                |                                      |                                    |                                            |                    |                                     |
|-------------------------|--------------------------------|--------------------------------------|------------------------------------|--------------------------------------------|--------------------|-------------------------------------|
| evidence_gbs            | 1 - Brighton level 1           | 2 - Brighton level 2                 | 3 - Brighton level 3               | 4 - Brighton level 4                       |                    |                                     |
| evidence_vasculitis     | 1 - Definite vasculitis        | 2 - Possible vasculitis              |                                    |                                            |                    |                                     |
| neuro_inf_assoc         | 1-Confirmed/Strong association | 2-Probable                           | 3-Possible                         | 4-Not described in Tab 5 Table 1           |                    |                                     |
| neuro_inf_assoc_details |                                |                                      |                                    |                                            |                    |                                     |
| neuro_disorder          | 1 - Yes                        | 0 - No                               |                                    |                                            |                    |                                     |
| neuro_disorder_detail   |                                |                                      |                                    |                                            |                    |                                     |
| headache                | 1 - Yes                        | 0 - No                               | 2 - Unknown                        |                                            |                    |                                     |
| reduced_consc           | 1 - Yes                        | 0 - No                               | 2 - Unknown                        |                                            |                    |                                     |
| conf                    | 1 - Yes                        | 0 - No                               | 2 - Unknown                        |                                            |                    |                                     |
| delirium                | 1 - Yes                        | 0 - No                               | 2 - Unknown                        |                                            |                    |                                     |
| del_att_aw              | 1 - Yes                        | 0 - No                               | 2 - Unknown                        |                                            |                    |                                     |
| del_change              | 1 - Yes                        | 0 - No                               | 2 - Unknown                        |                                            |                    |                                     |
| del_cog                 | 1 - Yes                        | 0 - No                               | 2 - Unknown                        |                                            |                    |                                     |
| del_cog_desc            |                                |                                      |                                    |                                            |                    |                                     |
| behav_change            | 1 - Yes                        | 0 - No                               | 2 - Unknown                        |                                            |                    |                                     |
| seizure                 | 1 - Yes                        | 0 - No                               | 2 - Unknown                        |                                            |                    |                                     |
| seizures_detail         | 1 - Focal                      | 2 - Generalised                      | 3 - Other                          |                                            |                    |                                     |
| seizures_detail_other   |                                |                                      |                                    |                                            |                    |                                     |
| visual_symp             | 1 - Yes                        | 0 - No                               | 2 - Unknown                        |                                            |                    |                                     |
| visual_symp_detail      | 1 - Visual field defect        | 2 - Diplopia                         | 3 - Reduced acuity                 | 4 - Other                                  |                    |                                     |
| photophobia             | 1 - Yes                        | 0 - No                               | 2 - Unknown                        |                                            |                    |                                     |
| neuro_symp_other        | 1 - Yes                        | 0 - No                               |                                    |                                            |                    |                                     |
| AVPU                    | 1 - Alert                      | 2 - To voice                         | 3 - To pain                        | 4 - Unresponsive                           |                    |                                     |
| GCS_total               |                                |                                      |                                    |                                            |                    |                                     |
| GCS_eyes                | 1 - no response                | 2 - to pain                          | 3 - to speech                      | 4 - spontaneously                          |                    |                                     |
| GCS_verbal              | 1 - no response                | 2 - incomprehensible sounds          | 3 - inappropriate words            | 4 - confused, but able to answer questions | 5 - oriented       |                                     |
| GCS_motor               | 1 - no response                | 2 - abnormal extension (decerebrate) | 3 - abnormal flexion (decorticate) | 4 - flexion withdrawal from pain           | 5 - localises pain | 6 - obeys commands                  |
| neck_stiff              | 1 - Yes                        | 0 - No                               |                                    |                                            |                    |                                     |
| disorient               | 1 - Yes                        | 0 - No                               |                                    |                                            |                    |                                     |
| witness_seiz            | 1 - Yes - focal                | 2 - Yes - generalised                | 3 - Yes - other                    | 0 - No                                     |                    |                                     |
| new_movement_dis        | 1 - Yes                        | 0 - No                               | 2 - Unknown                        |                                            |                    |                                     |
| new_movement_dis_detail | 1 - Ataxia                     | 2 - Chorea                           | 3 - Tremor                         | 4 - Myoclonus                              | 5 - Bradykinesia   | 6 - Other / combination of features |
| cran_neuro              | 1 - Yes                        | 0 - No                               |                                    |                                            |                    |                                     |
| cran_neuro_detail       |                                |                                      |                                    |                                            |                    |                                     |
| perip_neuro             | 1 - Yes                        | 0 - No                               |                                    |                                            |                    |                                     |
| perip_neuro_detail      |                                |                                      |                                    |                                            |                    |                                     |
| limb_weakness           | 1 - Yes                        | 0 - No                               |                                    |                                            |                    |                                     |
| limb_weakness_detail    |                                |                                      |                                    |                                            |                    |                                     |

|                       |                                   |                                          |                                  |            |
|-----------------------|-----------------------------------|------------------------------------------|----------------------------------|------------|
| Sensory_abnorm        | 1 - Yes                           | 0 - No                                   |                                  |            |
| sensory_abnorm_detail |                                   |                                          |                                  |            |
| dysphagia             | 1 - Yes                           | 0 - No                                   |                                  |            |
| dysphasia             | 1 - Yes                           | 0 - No                                   |                                  |            |
| dysphasia_detail      |                                   |                                          |                                  |            |
| LP_done               | 1 - Yes                           | 0 - No                                   |                                  |            |
| LP_date               |                                   |                                          |                                  |            |
| CSF_OP                |                                   |                                          |                                  |            |
| CSF_total_WCC         |                                   |                                          |                                  |            |
| CSF_neut              |                                   |                                          |                                  |            |
| csf_neut_units        | 1 - % of total                    | 2 - per µl or cumm or mm <sup>3</sup>    |                                  |            |
| CSF_lymp              |                                   |                                          |                                  |            |
| csf_lymp_units        | 1 - % of total                    | 2 - per µl or cumm or mm <sup>3</sup>    |                                  |            |
| CSF_rbc               |                                   |                                          |                                  |            |
| CSF_protein           |                                   |                                          |                                  |            |
| csf_protein_units     | 1 - g/L                           | 2 - mg/dL                                |                                  |            |
| CSF_glucose           |                                   |                                          |                                  |            |
| paired_blood_glucose  |                                   |                                          |                                  |            |
| csf_glucose_units     | 1 - mmol/L                        | 2 - mg/dL                                |                                  |            |
| CSF_albumin           |                                   |                                          |                                  |            |
| CSF_bands             | 1 - present<br>(same as<br>serum) | 2 - present<br>(different from<br>serum) | 3 - present (no<br>serum result) | 0 - absent |
| Other_non_micro_CSF   |                                   |                                          |                                  |            |
| gram_stain            |                                   |                                          |                                  |            |
| csf_culture           |                                   |                                          |                                  |            |
| CSF_HSV               | 1 - Positive                      | 0 - Negative                             | 2 - Not tested                   |            |
| CSF_VZV               | 1 - Positive                      | 0 - Negative                             | 2 - Not tested                   |            |
| CSF_enterovirus       | 1 - Positive                      | 0 - Negative                             | 2 - Not tested                   |            |
| CSF_tb                | 1 - Positive                      | 0 - Negative                             | 2 - Not tested                   |            |
| CSF_other_pathogen    | 1 - Yes                           | 0 - No                                   |                                  |            |
| CSF_other_p_desc      |                                   |                                          |                                  |            |
| ct_head               | 1 - Yes                           | 0 - No                                   |                                  |            |
| ct_head_result        |                                   |                                          |                                  |            |
| mri_brain             | 1 - Yes                           | 0 - No                                   |                                  |            |
| mri_brain_result      |                                   |                                          |                                  |            |
| mri_spine             | 1 - Yes                           | 0 - No                                   |                                  |            |
| mri_spine_result      |                                   |                                          |                                  |            |
| other_neuro_ex        | 1 - Yes                           | 0 - No                                   |                                  |            |
| eeg                   | 1 - Yes                           | 0 - No                                   |                                  |            |
| eeg_result            |                                   |                                          |                                  |            |
| NCS_EMG               | 1 - Yes                           | 0 - No                                   |                                  |            |
| ncs_EMG_result        |                                   |                                          |                                  |            |
| antin_ab              | 1 - Yes                           | 0 - No                                   | 2 - Unknown                      |            |
| ab_result             |                                   |                                          |                                  |            |
| hypoxia               | 1 - Yes                           | 0 - No                                   | 2 - Unknown                      |            |
| tx_oxygen             |                                   |                                          |                                  |            |
| tx_antivir            | 1 - Yes                           | 0 - No                                   |                                  |            |
| tx_conv_plasma        | 1 - Yes                           | 0 - No                                   |                                  |            |

|                        |          |           |                            |           |        |
|------------------------|----------|-----------|----------------------------|-----------|--------|
| tx_toc                 | 1 - Yes  | 0 - No    |                            |           |        |
| tx_vasopress           | 1 - Yes  | 0 - No    |                            |           |        |
| tx_anx                 | 1 - Yes  | 0 - No    |                            |           |        |
| tx_steroids            | 1 - Yes  | 0 - No    |                            |           |        |
| tx_steroids_dose       |          |           |                            |           |        |
| tx_steroids_start      |          |           |                            |           |        |
| tx_steroids_stop       |          |           |                            |           |        |
| tx_steroids_ind        |          |           |                            |           |        |
| tx_ivig                | 1 - Yes  | 0 - No    |                            |           |        |
| tx_ivig_dose           |          |           |                            |           |        |
| tx_ivig_start          |          |           |                            |           |        |
| tx_ivig_stop           |          |           |                            |           |        |
| tx_ivig_ind            |          |           |                            |           |        |
| tx_plex                | 1 - Yes  | 0 - No    |                            |           |        |
| tx_plex_start          |          |           |                            |           |        |
| tx_plex_stop           |          |           |                            |           |        |
| tx_plex_ind            |          |           |                            |           |        |
| tx_antic               | 1 - Yes  | 0 - No    |                            |           |        |
| tx_antic_dose          |          |           |                            |           |        |
| tx_antic_start         |          |           |                            |           |        |
| tx_antic_stop          |          |           |                            |           |        |
| tx_antic_ind           |          |           |                            |           |        |
| tx_antip               | 1 - Yes  | 0 - No    |                            |           |        |
| tx_antip_dose          |          |           |                            |           |        |
| tx_antip_start         |          |           |                            |           |        |
| tx_antip_stop          |          |           |                            |           |        |
| tx_antip_ind           |          |           |                            |           |        |
| tx_throm               | 1 - Yes  | 0 - No    |                            |           |        |
| tx_throm_dose          |          |           |                            |           |        |
| tx_throm_start         |          |           |                            |           |        |
| tx_thrombec            | 1 - Yes  | 0 - No    |                            |           |        |
| tx_thrombec_start      |          |           |                            |           |        |
| treatment_other        | 1 - Yes  | 0 - No    |                            |           |        |
| treatment_other_detail |          |           |                            |           |        |
| ITU                    | 1 - Yes  | 0 - No    |                            |           |        |
| date_ad_ITU            |          |           |                            |           |        |
| date_dis_ITU           |          |           |                            |           |        |
| niv                    | 1 - CPAP | 2 - BiPAP | 3 - Both CPAP<br>and BiPAP | 4 - Other | 0 - No |
| inv_vent               | 1 - Yes  | 0 - No    |                            |           |        |
| intub_date             |          |           |                            |           |        |
| extub_date             |          |           |                            |           |        |
| reintub                | 1 - Yes  | 0 - No    |                            |           |        |
| trache                 | 1 - Yes  | 0 - No    |                            |           |        |
| complications          | 1 - Yes  | 0 - No    |                            |           |        |
| complications_desc     |          |           |                            |           |        |
| death                  | 1 - Yes  | 0 - No    |                            |           |        |
| death_date             |          |           |                            |           |        |
| death_cause            |          |           |                            |           |        |
| autopsy_report         |          |           |                            |           |        |
| disch                  | 1 - Yes  | 0 - No    |                            |           |        |

|                                                                                                                      |                              |                                                                                                   |                                                                                                                           |                                                                                   |                                                                                                                                 |                                                                                                 |          |
|----------------------------------------------------------------------------------------------------------------------|------------------------------|---------------------------------------------------------------------------------------------------|---------------------------------------------------------------------------------------------------------------------------|-----------------------------------------------------------------------------------|---------------------------------------------------------------------------------------------------------------------------------|-------------------------------------------------------------------------------------------------|----------|
| discharge_MRS<br>disch_date<br>follow_up_date                                                                        | 0 - No symptoms at all       | 1 - No significant disability despite symptoms; able to carry out all usual duties and activities | 2 - Slight disability; unable to carry out all previous activities, but able to look after own affairs without assistance | 3 - Moderate disability; requiring some help, but able to walk without assistance | 4 - Moderately severe disability; unable to walk without assistance and unable to attend to own bodily needs without assistance | 5 - Severe disability; bedridden, incontinent and requiring constant nursing care and attention | 6 - Dead |
| covid_neuro_data<br>covid_neuro_hospital_total<br>covid_neuro_hospital_num<br>covid_neuro_time<br>covid_hospital_num | 1 - Yes                      | 0 - No                                                                                            |                                                                                                                           |                                                                                   |                                                                                                                                 |                                                                                                 |          |
| study                                                                                                                | 1 - Yes                      | 0 - No                                                                                            |                                                                                                                           |                                                                                   |                                                                                                                                 |                                                                                                 |          |
| case_def<br>pub<br>doi                                                                                               | 1 - Yes                      | 0 - No                                                                                            | 2 - submitted/submission planned                                                                                          |                                                                                   |                                                                                                                                 |                                                                                                 |          |
| control<br>control_def<br>case_control                                                                               | 1 - Yes                      | 0 - No                                                                                            |                                                                                                                           |                                                                                   |                                                                                                                                 |                                                                                                 |          |
| data_col                                                                                                             | 1 - Retrospective collection | 2 - Prospective collection                                                                        |                                                                                                                           |                                                                                   |                                                                                                                                 |                                                                                                 |          |
| 3                                                                                                                    |                              |                                                                                                   |                                                                                                                           |                                                                                   |                                                                                                                                 |                                                                                                 |          |
| 4                                                                                                                    |                              |                                                                                                   |                                                                                                                           |                                                                                   |                                                                                                                                 |                                                                                                 |          |

5 Section 3: Case definitions

6

7 3.1 COVID-19 case definitions

| COVID-19 Case definitions, modified from WHO definitions <sup>1</sup>                                                     |                                                                                                                                                                                                                                |                                                                           |                                                                                                                                                                                                                                                   |           |
|---------------------------------------------------------------------------------------------------------------------------|--------------------------------------------------------------------------------------------------------------------------------------------------------------------------------------------------------------------------------|---------------------------------------------------------------------------|---------------------------------------------------------------------------------------------------------------------------------------------------------------------------------------------------------------------------------------------------|-----------|
|                                                                                                                           | Confirmed                                                                                                                                                                                                                      | Probable                                                                  | Suspected                                                                                                                                                                                                                                         |           |
| <b>WHO COVID-19 case definitions, adapted from World Health Organization. COVID-19: situation report, 95.<sup>1</sup></b> | A person with laboratory confirmation <sup>2</sup> of SARS-CoV-2 infection, irrespective of clinical signs and symptoms. Confirmatory tests include a nucleic acid amplification test (e.g. RT-PCR) or validated antibody test | A suspected case, for whom testing for the COVID-19 virus is inconclusive | A patient with acute respiratory illness (fever and at least one sign/symptom of respiratory distress) AND history of travel to or residence in a location reporting community transmission of COVID-19 disease during the 14 days prior to onset |           |
|                                                                                                                           |                                                                                                                                                                                                                                | <b>OR</b>                                                                 | A suspected case, for whom testing could not be performed for any reason                                                                                                                                                                          | <b>OR</b> |
|                                                                                                                           |                                                                                                                                                                                                                                | <b>OR</b>                                                                 | A suspected case, with a negative RT-PCR test for COVID-19 but ongoing clinical suspicion, with supportive features on blood tests and/or radiological investigations, and no alternative aetiology identified                                    | <b>OR</b> |
|                                                                                                                           |                                                                                                                                                                                                                                |                                                                           | <b>OR</b>                                                                                                                                                                                                                                         |           |
|                                                                                                                           |                                                                                                                                                                                                                                |                                                                           | A patient with severe acute respiratory illness (fever and at least one sign/symptom of respiratory distress AND requiring hospitalisation) AND in the absence of an alternative explanation that fully explains the clinical presentation        |           |
|                                                                                                                           |                                                                                                                                                                                                                                |                                                                           | <b>OR</b>                                                                                                                                                                                                                                         |           |
|                                                                                                                           |                                                                                                                                                                                                                                |                                                                           | A patient with systemic and/or respiratory features suspected to be due to COVID-19 by the assessing clinician                                                                                                                                    |           |

| COVID-19 Disease Severity Scoring <sup>3</sup> |                                                                 |                                                                                                                                                                                                                                                                                                                                                                                                                                                                                                                                                                                                                                                                                                                                                                                                                                                                                                                                                                                                                                                                                                                                                                                                                                                                                                                                                                                                                                                                                                                                                                                               |
|------------------------------------------------|-----------------------------------------------------------------|-----------------------------------------------------------------------------------------------------------------------------------------------------------------------------------------------------------------------------------------------------------------------------------------------------------------------------------------------------------------------------------------------------------------------------------------------------------------------------------------------------------------------------------------------------------------------------------------------------------------------------------------------------------------------------------------------------------------------------------------------------------------------------------------------------------------------------------------------------------------------------------------------------------------------------------------------------------------------------------------------------------------------------------------------------------------------------------------------------------------------------------------------------------------------------------------------------------------------------------------------------------------------------------------------------------------------------------------------------------------------------------------------------------------------------------------------------------------------------------------------------------------------------------------------------------------------------------------------|
| <b>Mild disease</b>                            |                                                                 | Symptomatic patients (Table 1) meeting the case definition for COVID-19 without evidence of viral pneumonia or hypoxia. See the WHO website for most up-to-date case definitions. <sup>1</sup>                                                                                                                                                                                                                                                                                                                                                                                                                                                                                                                                                                                                                                                                                                                                                                                                                                                                                                                                                                                                                                                                                                                                                                                                                                                                                                                                                                                                |
| <b>Moderate disease</b>                        | <b>Pneumonia</b>                                                | <b>Adolescent or adult</b> with clinical signs of pneumonia (fever, cough, dyspnoea, fast breathing) but no signs of severe pneumonia, including SpO <sub>2</sub> ≥ 90% on room air <sup>4</sup><br><b>Child</b> with clinical signs of non-severe pneumonia (cough or difficulty breathing + fast breathing and/or chest indrawing) and no signs of severe pneumonia. Fast breathing (in breaths/min): < 2 months: ≥ 60; 2–11 months: ≥ 50; 1–5 years: ≥ 40 <sup>5</sup><br>While the diagnosis can be made on clinical grounds; chest imaging (radiograph, CT scan, ultrasound) may assist in diagnosis and identify or exclude pulmonary complications.                                                                                                                                                                                                                                                                                                                                                                                                                                                                                                                                                                                                                                                                                                                                                                                                                                                                                                                                    |
| <b>Severe disease</b>                          | <b>Severe pneumonia</b>                                         | <b>Adolescent or adult</b> with clinical signs of pneumonia (fever, cough, dyspnoea, fast breathing) plus one of the following: respiratory rate > 30 breaths/min; severe respiratory distress; or SpO <sub>2</sub> < 90% on room air. <sup>4</sup><br><b>Child</b> with clinical signs of pneumonia (cough or difficulty in breathing) + at least one of the following:<br>• Central cyanosis or SpO <sub>2</sub> < 90%; severe respiratory distress (e.g. fast breathing, grunting, very severe chest indrawing); general danger sign: inability to breastfeed or drink, lethargy or unconsciousness, or convulsions <sup>5,6</sup><br>• Fast breathing (in breaths/min): < 2 months: ≥ 60; 2–11 months: ≥ 50; 1–5 years: ≥ 40 <sup>5</sup><br>While the diagnosis can be made on clinical grounds; chest imaging (radiograph, CT scan, ultrasound) may assist in diagnosis and identify or exclude pulmonary complications.                                                                                                                                                                                                                                                                                                                                                                                                                                                                                                                                                                                                                                                                |
| <b>Critical disease</b>                        | <b>Acute respiratory distress syndrome (ARDS)<sup>7-9</sup></b> | <b>Onset:</b> within 1 week of a known clinical insult (i.e. pneumonia) or new or worsening respiratory symptoms.<br><b>Chest imaging:</b> (radiograph, CT scan, or lung ultrasound): bilateral opacities, not fully explained by volume overload, lobar or lung collapse, or nodules.<br><b>Origin of pulmonary infiltrates:</b> respiratory failure not fully explained by cardiac failure or fluid overload. Need objective assessment (e.g. echocardiography) to exclude hydrostatic cause of infiltrates/oedema if no risk factor present.<br><b>Oxygenation impairment in adults<sup>7,9</sup>:</b><br>• Mild ARDS: 200 mmHg < PaO <sub>2</sub> /FiO <sub>2</sub> a ≤ 300 mmHg (with PEEP or CPAP ≥ 5 cmH <sub>2</sub> O).b<br>• Moderate ARDS: 100 mmHg < PaO <sub>2</sub> /FiO <sub>2</sub> ≤ 200 mmHg (with PEEP ≥ 5 cmH <sub>2</sub> O).b<br>• Severe ARDS: PaO <sub>2</sub> /FiO <sub>2</sub> ≤ 100 mmHg (with PEEP ≥ 5 cmH <sub>2</sub> O).b<br><b>Oxygenation impairment in children:</b> note OI and OSI.c Use OI when available. If PaO <sub>2</sub> not available, wean FiO <sub>2</sub> to maintain SpO <sub>2</sub> ≤ 97% to calculate OSI or SpO <sub>2</sub> /FiO <sub>2</sub> ratio:<br>• Bilevel (NIV or CPAP) ≥ 5 cmH <sub>2</sub> O via full face mask: PaO <sub>2</sub> /FiO <sub>2</sub> ≤ 300 mmHg or SpO <sub>2</sub> /FiO <sub>2</sub> ≤ 264.<br>• Mild ARDS (invasively ventilated): 4 ≤ OI < 8 or 5 ≤ OSI < 7.5.<br>• Moderate ARDS (invasively ventilated): 8 ≤ OI < 16 or 7.5 ≤ OSI < 12.3.<br>• Severe ARDS (invasively ventilated): OI ≥ 16 or OSI ≥ 12.3. |
| <b>Critical disease</b>                        | <b>Sepsis<sup>10,11</sup></b>                                   | <b>Adults:</b> acute life-threatening organ dysfunction caused by a dysregulated host response to suspected or proven infection. Signs of organ dysfunction include: altered mental status, difficult or fast breathing, low oxygen saturation, reduced urine output <sup>10</sup> , fast heart rate, weak pulse, cold extremities or low blood pressure, skin mottling, laboratory evidence of coagulopathy, thrombocytopenia, acidosis, high lactate, or hyperbilirubinemia.<br><b>Children:</b> suspected or proven infection and ≥ 2 age-based systemic inflammatory response syndrome (SIRS) criteria,e of which one must be abnormal temperature or white blood cell count.                                                                                                                                                                                                                                                                                                                                                                                                                                                                                                                                                                                                                                                                                                                                                                                                                                                                                                             |
|                                                | <b>Septic shock<sup>10,11</sup></b>                             | <b>Adults:</b> persistent hypotension despite volume resuscitation, requiring vasopressors to maintain MAP ≥ 65 mmHg and serum lactate level > 2 mmol/L.<br><b>Children:</b> any hypotension (SBP < 5th centile or > 2 SD below normal for age) or two or three of the following: altered mental status; bradycardia or tachycardia (HR < 90 bpm or > 160 bpm in infants and heart rate < 70 bpm or > 150 bpm in children); prolonged capillary refill (> 2 sec) or weak pulse; fast breathing; mottled or cool skin or petechial or purpuric rash; high lactate; reduced urine output; hyperthermia or hypothermia. <sup>12,13</sup> .                                                                                                                                                                                                                                                                                                                                                                                                                                                                                                                                                                                                                                                                                                                                                                                                                                                                                                                                                       |



---

**Other complications that have been described in COVID-19 patients include acute, life-threatening conditions such as: acute pulmonary embolism, acute coronary syndrome, acute stroke and delirium. Clinical suspicion for these complications should be heightened when caring for COVID-19 patients, and appropriate diagnostic and treatment protocols available.**

**a** If altitude is higher than 1000 m, then the correction factor should be calculated as follows:  $\text{PaO}_2/\text{FiO}_2 \times \text{barometric pressure}/760$ .

**b** When  $\text{PaO}_2$  is not available,  $\text{SpO}_2/\text{FiO}_2 \leq 315$  suggests ARDS (including in non-ventilated patients).

**c** Oxygenation Index (OI) is an invasive measurement of the severity of hypoxaemic respiratory failure and may be used to predict outcomes in paediatric patients. It is calculated as follows: percentage of fraction of inhaled oxygen multiplied by the mean airway pressure (in mmHg), divided by the partial pressure of arterial oxygen (in mmHg). Oxygen saturation index (OSI) is a non-invasive measurement and has been shown to be a reliable surrogate marker of OI in children and adults with respiratory failure. OSI replaces  $\text{PaO}_2$  with oxygen saturation as measured by pulse oximetry ( $\text{SpO}_2$ ) in the OI equation.

**d** The SOFA score ranges from 0 to 24 and includes points related to six organ systems: respiratory (hypoxaemia defined by low  $\text{PaO}_2/\text{FiO}_2$ ); coagulation (low platelets); liver (high bilirubin); cardiovascular (hypotension); central nervous system (low level of consciousness defined by Glasgow Coma Scale); and renal (low urine output or high creatinine). Sepsis is defined by an increase in the sepsis-related SOFA score of  $\geq 2$  points. Assume the baseline score is 0 if data are not available.<sup>14</sup>

**e** SIRS criteria: abnormal temperature ( $> 38.5^\circ\text{C}$  or  $< 36^\circ\text{C}$ ); tachycardia for age or bradycardia for age if  $< 1$  year; tachypnoea for age or need for mechanical ventilation; abnormal white blood cell count for age or  $> 10\%$  bands.

Abbreviations: BP blood pressure; bpm beats per minute; CPAP continuous positive airway pressure; CT computed tomography;  $\text{FiO}_2$  fraction of inspired oxygen; MAP mean arterial pressure; NIV non-invasive ventilation; OI Oxygenation Index; OSI Oxygenation Index using  $\text{SpO}_2$ ;  $\text{PaO}_2$  partial pressure arterial oxygen; PEEP positive end-expiratory pressure; SBP systolic blood pressure; SD standard deviation; SIRS systemic inflammatory response syndrome; SOFA sequential organ failure assessment;  $\text{SpO}_2$  oxygen saturation.

## References

1. World Health Organization. COVID-19: situation report, 95. Link: [https://www.who.int/docs/default-source/coronaviruse/situation-reports/20200424-sitrep-95-covid-19.pdf?sfvrsn=e8065831\\_4](https://www.who.int/docs/default-source/coronaviruse/situation-reports/20200424-sitrep-95-covid-19.pdf?sfvrsn=e8065831_4)
2. WHO. World Health Organization. Laboratory testing for coronavirus disease 2019 (COVID-19) in suspected human cases. Interim Guide 2020., Link: <https://www.who.int/emergencies/diseases/novel-coronavirus-2019/technical-guidance/laboratory-guidance>
3. World Health Organization, 2020. Clinical management of COVID-19: interim guidance, 27 May 2020 (No. WHO/2019-nCoV/clinical/2020.5). World Health Organization.
4. IMAI District Clinician Manual. Hospital care for adolescents and adults. Geneva: World Health Organization; 2020 (Link:[https://apps.who.int/iris/bitstream/handle/10665/77751/9789241548290\\_Vol2\\_eng.pdf?sequence=3](https://apps.who.int/iris/bitstream/handle/10665/77751/9789241548290_Vol2_eng.pdf?sequence=3), accessed 13 May 2020).
5. Pocket book of hospital care for children: Guidelines for the management of common childhood illnesses: Second edition. Geneva: World Health Organization; 2013 (Link: [https://www.who.int/maternal\\_child\\_adolescent/documents/child\\_hospital\\_care/en/](https://www.who.int/maternal_child_adolescent/documents/child_hospital_care/en/), accessed 13 May 2020).
6. Russell FM, Reyburn R, Chan J, Tuivaga E, Lim R, Lai J, et al. Impact of the change in WHO's severe pneumonia case definition on hospitalized pneumonia epidemiology: case studies from six countries. Bull World Health Organ. 2019;97(6):386-93. Epub 2019/06/19.
7. Force ADT, Ranieri VM, Rubenfeld GD, Thompson BT, Ferguson ND, Caldwell E, et al. Acute respiratory distress syndrome: the Berlin Definition. JAMA. 2012;307(23):2526-33. Epub 2012/07/17.
8. Khemani RG, Smith LS, Zimmerman JJ, Erickson S, Pediatric Acute Lung Injury Consensus Conference Group. Pediatric acute respiratory distress syndrome: definition, incidence, and epidemiology: proceedings from the Pediatric Acute Lung Injury Consensus Conference. Pediatr Crit Care Med. 2015;16(5 Suppl 1):S23-40. Epub 2015/06/04.
9. Riviello ED, Kiviri W, Twagirumugabe T, Mueller A, Banner-Goodspeed VM, Officer L, et al. Hospital Incidence and Outcomes of the Acute Respiratory Distress Syndrome Using the Kigali Modification of the Berlin Definition. Am J Respir Crit Care Med. 2016;193(1):52-9. Epub 2015/09/10.
10. Sepsis and Septic Shock: 2016. Intensive Care Med. 2017;43(3):304-77. Epub 2017/01/20.
11. Weiss SL, Peters MJ, Alhazzani W, Agus MSD, Flori HR, Inwald DP, et al. Surviving Sepsis Campaign International Guidelines for the Management of Septic Shock and Sepsis-associated Organ Dysfunction in Children. Intensive Care Med. 2020;46(Suppl 1):10-67. Epub 2020/02/08.
12. Goldstein B, Giroir B, Randolph A, International Consensus Conference on Pediatric Sepsis. International pediatric sepsis consensus conference: definitions for sepsis and organ dysfunction in pediatrics. Pediatr Crit Care Med. 2005;6(1):2-8. Epub 2005/01/08.
13. Davis AL, Carcillo JA, Aneja RK, Deymann AJ, Lin JC, Nguyen TC, et al. American College of Critical Care Medicine Clinical Practice Parameters for Hemodynamic Support of Pediatric and Neonatal Septic Shock. Crit Care Med. 2017;45(6):1061-93. Epub 2017/05/17.
14. Vincent JL, Moreno R, Takala J, Willatts S, De Mendonca A, Bruining H, et al. The SOFA (Sepsis-related Organ Failure Assessment) score to describe organ dysfunction/failure. On behalf of the Working Group on Sepsis-Related Problems of the European Society of Intensive Care Medicine. Intensive Care Med. 1996;22(7):707-10. Epub 1996/07/01.

9 **3.2 Neurological case definitions**  
10

| 1. Meningitis and meningism <sup>1</sup>                                                                                                                                                       |                                    |                          |                                     |
|------------------------------------------------------------------------------------------------------------------------------------------------------------------------------------------------|------------------------------------|--------------------------|-------------------------------------|
| Level 1<br>Meningitis                                                                                                                                                                          | Level 2<br>Possible meningitis     | Level 3<br>Meningism     | Level 4<br>Suspected meningitis     |
| [ ] Suspected meningitis with no other diagnoses apparent, but does not fulfil level 3 criteria                                                                                                |                                    |                          |                                     |
| [ ] Absence of an alternative diagnosis for symptoms<br><br><b>AND</b><br>[ ] Neck stiffness<br><br><b>OR</b><br>[ ] Kernig's sign positive<br><br><b>OR</b><br>[ ] Brudzinsky's sign positive |                                    |                          |                                     |
| [ ] Fever ( $\geq 38^{\circ}\text{C}$ )                                                                                                                                                        |                                    |                          |                                     |
| [ ] CSF total white cell count > 5 cells/mm <sup>3</sup><br><br><b>OR</b><br>[ ] Meningeal enhancement seen on contrast enhanced CT or MRI                                                     |                                    |                          |                                     |
| [ ] Level 1<br>Meningitis                                                                                                                                                                      | [ ] Level 2<br>Possible meningitis | [ ] Level 3<br>Meningism | [ ] Level 4<br>Suspected meningitis |

11

| 2. Encephalitis and encephalopathy (including delirium) <sup>2,3,4</sup>                                                                                                                                                                                                                                                                                                                    |                                                           |                                                     |                                                              |
|---------------------------------------------------------------------------------------------------------------------------------------------------------------------------------------------------------------------------------------------------------------------------------------------------------------------------------------------------------------------------------------------|-----------------------------------------------------------|-----------------------------------------------------|--------------------------------------------------------------|
| Level 1<br>Encephalitis*                                                                                                                                                                                                                                                                                                                                                                    | Level 2<br>Possible encephalitis                          | Level 3<br>Encephalopathy^                          | Level 4<br>Suspected encephalopathy                          |
| <input type="checkbox"/> Suspected encephalopathy with no other diagnosis apparent, but does not fulfill level 3 criteria                                                                                                                                                                                                                                                                   |                                                           |                                                     |                                                              |
| <input type="checkbox"/> Acute or sub acute (<4 weeks) alteration in consciousness, cognition (including <b>delirium</b> <sup>+</sup> ), personality or behaviour persisting for more than 24 hours<br><br><b>AND</b><br><input type="checkbox"/> Absence of an alternative diagnosis for symptoms                                                                                          |                                                           |                                                     |                                                              |
| <input type="checkbox"/> New onset seizure<br><b>OR</b><br><input type="checkbox"/> New focal neurological signs<br><b>OR</b><br><input type="checkbox"/> Fever ( $\geq 38^{\circ}\text{C}$ )<br><b>OR</b><br><input type="checkbox"/> Movement disorder (includes: Parkinsonism, oromotor dysfunction etc.)<br><b>OR</b><br><input type="checkbox"/> EEG consistent with focal abnormality |                                                           |                                                     |                                                              |
| <input type="checkbox"/> CSF total white cell count > 5 cells/mm <sup>3</sup><br><b>OR</b><br><input type="checkbox"/> Neuroimaging compatible with encephalitis<br><b>OR</b><br><input type="checkbox"/> Confirmation of brain inflammation on brain biopsy                                                                                                                                |                                                           |                                                     |                                                              |
| <input type="checkbox"/> Level 1<br>Encephalitis*                                                                                                                                                                                                                                                                                                                                           | <input type="checkbox"/> Level 2<br>Possible encephalitis | <input type="checkbox"/> Level 3<br>Encephalopathy^ | <input type="checkbox"/> Level 4<br>Suspected encephalopathy |

\*Encephalitis is inflammation of the brain parenchyma;

^**Encephalopathy** is a rapidly developing pathobiological process in the brain that can lead to a change in consciousness, cognition (with a clinical presentation of delirium or coma), personality or behaviour persisting for more than 24 hours.

+**Delirium**<sup>4</sup> is defined as a clinical manifestation of encephalopathy, when the following features are present:

- A) Disturbance in attention (reduced ability to direct, focus, sustain, and shift attention) and awareness (reduced orientation to the environment);
- B) Develops over a short period of time, represents a change from baseline attention and awareness, and tends to fluctuate in severity during the course of the day
- C) An additional disturbance in cognition (e.g., memory deficit, disorientation, language, visuospatial ability, or perception).
- D) Criteria A and C are not explained by another pre-existing, established, or evolving neurocognitive disorder, and do not occur in the context of a severely reduced level of arousal, such as coma.
- E) There is evidence from the history, physical examination, or laboratory findings that the disturbance is a direct physiologic consequence of another medical condition, substance intoxication or withdrawal, or exposure to a toxin, or is because of multiple etiologies.

| 3. Myelitis and myelopathy <sup>5</sup>                                                                                                                                                                                   |                                  |                           |                                     |
|---------------------------------------------------------------------------------------------------------------------------------------------------------------------------------------------------------------------------|----------------------------------|---------------------------|-------------------------------------|
| Level 1<br>Myelitis                                                                                                                                                                                                       | Level 2<br>Possible myelitis     | Level 3<br>Myelopathy     | Level 3<br>Suspected myelopathy     |
| [ ] Weakness or sensory disturbance of upper and/or lower limbs, developing to its worst severity between 4h and 21d following onset of symptoms *                                                                        |                                  |                           |                                     |
| [ ] Absence of an alternative diagnosis for symptoms<br><b>WITH</b><br>[ ] Brisk reflexes or extensor plantar response<br><b>OR</b><br>[ ] Bladder or bowel dysfunction<br><b>OR</b><br>[ ] Clearly defined sensory level |                                  |                           |                                     |
| [ ] Absence of extra-axial compressive aetiology by neuroimaging (MRI or CT myelography)<br><b>AND</b><br>[ ] Absence of flow voids on the surface of the spinal cord suggestive of arteriovenous malformation (MRI)      |                                  |                           |                                     |
| [ ] CSF total white cell count >5 cells/mm <sup>3</sup><br><b>OR</b><br>[ ] MRI changes consistent with myelitis (gadolinium enhancement or T2 hyperintensity)<br><b>OR</b><br>[ ] Elevated CSF IgG index                 |                                  |                           |                                     |
| [ ] Level 1<br>Myelitis                                                                                                                                                                                                   | [ ] Level 2<br>Possible myelitis | [ ] Level 3<br>Myelopathy | [ ] Level 4<br>Suspected myelopathy |

| 4. Acute Disseminated Encephalomyelitis (ADEM) <sup>6,7</sup>                                                                                                                                                                                                                                                                                                        |                                                   |                                                    |
|----------------------------------------------------------------------------------------------------------------------------------------------------------------------------------------------------------------------------------------------------------------------------------------------------------------------------------------------------------------------|---------------------------------------------------|----------------------------------------------------|
| Level 1<br>ADEM                                                                                                                                                                                                                                                                                                                                                      | Level 2<br>Probable ADEM                          | Level 3<br>Suspected ADEM                          |
| <input type="checkbox"/> Suspected ADEM with no other diagnosis apparent, but does not fit level 2 criteria                                                                                                                                                                                                                                                          |                                                   |                                                    |
| <input type="checkbox"/> first multifocal clinical CNS event<br><br><b>AND</b><br><br><input type="checkbox"/> alteration in consciousness or behavioural change (encephalopathy) unexplained by fever/systemic illness/postictal symptoms<br><br><b>AND</b><br><br><input type="checkbox"/> abnormal brain MRI with typical diffuse, poorly demarcated lesions >1cm |                                                   |                                                    |
| <input type="checkbox"/> no new clinical or MRI findings 3 months or more after symptom onset<br><br><b>OR</b><br><br><input type="checkbox"/> signs/symptoms/MRI findings consistent with multiphasic ADEM*                                                                                                                                                         |                                                   |                                                    |
| <input type="checkbox"/> Level 1<br>ADEM                                                                                                                                                                                                                                                                                                                             | <input type="checkbox"/> Level 2<br>Probable ADEM | <input type="checkbox"/> Level 3<br>Suspected ADEM |
| <p>*Multiphasic ADEM – two episodes of Level 2 ADEM separated by three months but not followed by any further events. The second ADEM event can involve either new or re-emergence of prior neurological symptoms/signs/MRI findings. Beyond a second encephalopathic event, the diagnosis is no longer consistent with multiphasic ADEM.</p>                        |                                                   |                                                    |

| 5. Guillain-Barré Syndrome <sup>8</sup>                                                                                                                                                                                                                                                                                                                                                                                  |                                  |                                  |                                  |
|--------------------------------------------------------------------------------------------------------------------------------------------------------------------------------------------------------------------------------------------------------------------------------------------------------------------------------------------------------------------------------------------------------------------------|----------------------------------|----------------------------------|----------------------------------|
| Level 1                                                                                                                                                                                                                                                                                                                                                                                                                  | Level 2                          | Level 3                          | Level 4                          |
| Suspected Guillain-Barré syndrome with no other diagnosis apparent, but does not fulfill level 3 criteria                                                                                                                                                                                                                                                                                                                |                                  |                                  |                                  |
| <input type="checkbox"/> Bilateral and flaccid weakness of the limbs<br><b>AND</b><br><input type="checkbox"/> Absence of an alternative diagnosis for weakness<br><b>AND</b><br><input type="checkbox"/> Decreased or absent deep tendon reflexes in affected limbs<br><b>AND</b><br><input type="checkbox"/> Monophasic illness pattern with weakness nadir between 12 hours and 28 days, followed by clinical plateau |                                  |                                  |                                  |
| <input type="checkbox"/> CSF total white cell count < 50 cells/mm <sup>3</sup><br><b>OR</b><br><input type="checkbox"/> If CSF results unavailable, electrophysiological findings consistent with GBS                                                                                                                                                                                                                    |                                  |                                  |                                  |
| <input type="checkbox"/> CSF protein level above laboratory normal value AND CSF total white cell count < 50 cells/mm <sup>3</sup><br><b>AND</b><br><input type="checkbox"/> Electrophysiological findings consistent with GBS                                                                                                                                                                                           |                                  |                                  |                                  |
| <input type="checkbox"/> Level 1                                                                                                                                                                                                                                                                                                                                                                                         | <input type="checkbox"/> Level 2 | <input type="checkbox"/> Level 3 | <input type="checkbox"/> Level 4 |

**6. Cerebrovascular disease a) Stroke and Transient Ischaemic Attack<sup>9,10</sup>**

**Definitions**

|                                             |                                                                                                                                                                                                                                                                                                                                                                                                                                                                                                                                                                                           |
|---------------------------------------------|-------------------------------------------------------------------------------------------------------------------------------------------------------------------------------------------------------------------------------------------------------------------------------------------------------------------------------------------------------------------------------------------------------------------------------------------------------------------------------------------------------------------------------------------------------------------------------------------|
| Central Nervous System (CNS) infarction     | Brain, spinal cord, or retinal cell death attributable to ischemia, based on:<br><br><input type="checkbox"/> clinical evidence of cerebral, spinal cord, or retinal focal ischemic injury based on symptoms persisting $\geq 24$ hours or until death, and other etiologies excluded (CNS infarction includes hemorrhagic infarctions, types I and II, see 'Intracerebral hemorrhage')<br><br><b>OR</b><br><br><input type="checkbox"/> pathological, imaging, or other objective evidence of cerebral, spinal cord, or retinal focal ischemic injury in a defined vascular distribution |
| Silent CNS infarction                       | <input type="checkbox"/> Imaging or neuropathological evidence of CNS infarction, without a history of acute neurological dysfunction attributable to the lesion.                                                                                                                                                                                                                                                                                                                                                                                                                         |
| Ischemic stroke                             | <input type="checkbox"/> An episode of neurological dysfunction caused by focal cerebral, spinal, or retinal infarction.                                                                                                                                                                                                                                                                                                                                                                                                                                                                  |
| Intracerebral hemorrhage                    | <input type="checkbox"/> A focal collection of blood within the brain parenchyma or ventricular system that is not caused by trauma. (Intracerebral hemorrhage includes parenchymal hemorrhages after CNS infarction, type I - petechiae of blood along the margins of the infarction, and type II - confluent petechiae within the infarction but without a space-occupying effect.)                                                                                                                                                                                                     |
| Silent cerebral hemorrhage                  | <input type="checkbox"/> A focal collection of chronic blood products within the brain parenchyma, subarachnoid space, or ventricular system on neuroimaging or neuropathological examination that is not caused by trauma and without a history of acute neurological dysfunction attributable to the lesion.                                                                                                                                                                                                                                                                            |
| Stroke caused by intracerebral hemorrhage   | <input type="checkbox"/> Rapidly developing clinical signs of neurological dysfunction attributable to a focal collection of blood within the brain parenchyma or ventricular system that is not caused by trauma.                                                                                                                                                                                                                                                                                                                                                                        |
| Subarachnoid hemorrhage                     | <input type="checkbox"/> Bleeding into the subarachnoid space (the space between the arachnoid membrane and the pia mater of the brain or spinal cord)                                                                                                                                                                                                                                                                                                                                                                                                                                    |
| Stroke caused by subarachnoid hemorrhage    | <input type="checkbox"/> Rapidly developing signs of neurological dysfunction and/or headache because of bleeding into the subarachnoid space (the space between the arachnoid membrane and the pia mater of the brain or spinal cord), which is not caused by trauma.                                                                                                                                                                                                                                                                                                                    |
| Stroke caused by cerebral venous thrombosis | <input type="checkbox"/> Infarction or hemorrhage in the brain, spinal cord, or retina because of thrombosis of a cerebral venous structure. Symptoms or signs caused by reversible edema without infarction or hemorrhage do not qualify as stroke.                                                                                                                                                                                                                                                                                                                                      |
| Stroke, not otherwise specified             | <input type="checkbox"/> An episode of acute neurological dysfunction presumed to be caused by ischemia or hemorrhage, persisting $\geq 24$ hours or until death, but without sufficient evidence to be classified as one of the above.                                                                                                                                                                                                                                                                                                                                                   |
| Transient ischemic attack (TIA)             | <input type="checkbox"/> A transient episode of neurological dysfunction caused by focal brain, spinal cord, or retinal ischemia, without acute infarction                                                                                                                                                                                                                                                                                                                                                                                                                                |



| 6. Cerebrovascular disease b) Central nervous system (CNS) vasculitis <sup>11</sup>                                               |                                                                                                                                                                                                                                                                                                                                          |                                                                                                                                                                                                                                                                                                                                                                                                                                                                                              |
|-----------------------------------------------------------------------------------------------------------------------------------|------------------------------------------------------------------------------------------------------------------------------------------------------------------------------------------------------------------------------------------------------------------------------------------------------------------------------------------|----------------------------------------------------------------------------------------------------------------------------------------------------------------------------------------------------------------------------------------------------------------------------------------------------------------------------------------------------------------------------------------------------------------------------------------------------------------------------------------------|
|                                                                                                                                   | Definite                                                                                                                                                                                                                                                                                                                                 | Possible                                                                                                                                                                                                                                                                                                                                                                                                                                                                                     |
| Central Nervous System (CNS) vasculitis                                                                                           | <p>Clinical presentation compatible with CNS vasculitis with exclusion of alternative possible diagnoses and of primary systemic vasculitic syndrome</p> <p><b>AND</b></p> <p>Positive CNS histology (biopsy or autopsy) showing CNS angiitis (granulomatous, lymphocytic or necrotising), including evidence of vessel wall damage.</p> | <p>Clinical presentation compatible with CNS vasculitis with exclusion of alternative possible diagnoses and of primary systemic vasculitic syndrome</p> <p><b>AND</b></p> <p>Laboratory and imaging support for CNS inflammation (elevated levels of CSF protein and/or cells, and/or the presence of oligoclonal bands and/or MR scan evidence compatible with CNS vasculitis), with angiographic* exclusion of other specific entities, but without histological proof of vasculitis.</p> |
| *Certain disorders, perhaps most particularly moyamoya disease, may require formal contrast angiography for definitive diagnosis. |                                                                                                                                                                                                                                                                                                                                          |                                                                                                                                                                                                                                                                                                                                                                                                                                                                                              |

| 7. Other neurological syndrome                                                                                                                                                                                                                                                                                                       |
|--------------------------------------------------------------------------------------------------------------------------------------------------------------------------------------------------------------------------------------------------------------------------------------------------------------------------------------|
| Any new onset neurological disease suspected by the clinician to be associated with recent COVID-19 infection, including neuropsychiatric disease (psychosis, affective disorders), complications of critical illness (myopathy, neuropathy), and olfactory dysfunction (anosmia, ageusia etc.) with no other neurological features. |

Tables 1-5 from Mehta et al.<sup>12</sup>

**References**

1. McGill F, Heyderman RS, Michael BD, et al. The UK joint specialist societies guideline on the diagnosis and management of acute meningitis and meningococcal sepsis in immunocompetent adults. *J Infect* 2016;72:405-38.
2. Venkatesan A, Tunkel AR, Bloch KC, et al. Case Definitions, Diagnostic Algorithms, and Priorities in Encephalitis: Consensus Statement of the International Encephalitis Consortium. *Clin Infect Dis* 2013; 57: 1114–28.
3. Granerod J, Ambrose HE, Davies NWS, et al. Causes of encephalitis and differences in their clinical presentations in England: A multicentre, population-based prospective study. *Lancet Infect Dis* 2010. 10(12): 835-44.
4. Slooter, Arjen JC, et al. "Updated nomenclature of delirium and acute encephalopathy: statement of ten Societies." *Intensive care medicine* (2020): 1-3.
5. Transverse Myelitis Consortium Working Group. Proposed diagnostic criteria and nosology of acute transverse myelitis. *Neurology* 2002; **59**: 499–505.
6. Krupp LB, Tardieu M, Amato MP, et al. International Pediatric Multiple Sclerosis Study Group criteria for pediatric multiple sclerosis and immune-mediated central nervous system demyelinating disorders: Revisions to the 2007 definitions. *Mult. Scler. J.* 2013. 19(10):1261-7
7. Sejvar JJ, Kohl KS, Bilynsky R, et al. Encephalitis, myelitis, and acute disseminated encephalomyelitis (ADEM): Case definitions and guidelines for collection, analysis, and presentation of immunization safety data. *Vaccine* 2007. 25(31):5771-92
8. Sejvar JJ, Kohl KS, Gidudu J, et al. Guillain-Barré syndrome and Fisher syndrome: Case definitions and guidelines for collection, analysis, and presentation of immunization safety data. *Vaccine* 2011. 29(3):599-612.
9. Sacco RL, Kasner SE, Broderick JP, et al. An Updated Definition of Stroke for the 21st Century. *Stroke* 2013; **44**: 2064–89.
10. Easton JD, Saver JL, Albers GW, et al. Definition and Evaluation of Transient Ischemic Attack. *Stroke* 2009; **40**: 2276–93.
11. Rice CM, Scolding NJ. The diagnosis of primary central nervous system vasculitis, *Practical Neurology* 2020;20:109-114.
12. Mehta R, Soares CN, Medialdea-Carrera R, et al. The spectrum of neurological disease associated with Zika and chikungunya viruses in adults in Rio de Janeiro, Brazil: A case series. *PLoS Negl Trop Dis.* 2018;12(2):e0006212.

### 3.3 COVID-19: association between viral infection and neurological disease

|                                                                                   | Confirmed                                             | Probable                                                                        | Possible                                                                                                                                                                                                                                                                                                                                                                                                      |
|-----------------------------------------------------------------------------------|-------------------------------------------------------|---------------------------------------------------------------------------------|---------------------------------------------------------------------------------------------------------------------------------------------------------------------------------------------------------------------------------------------------------------------------------------------------------------------------------------------------------------------------------------------------------------|
| <b>SARS-CoV-2 meningitis, encephalitis, CNS vasculitis, myelitis/myelopathy**</b> | 1. SARS-CoV-2 detected in CSF/ brain tissue †,        | 1. SARS-CoV-2 detected in respiratory or other non-CNS sample ‡,                | Patient meets suspected case definition of COVID-19 according to national or WHO guidance (as below), based on clinical symptoms and epidemiological risk factors.                                                                                                                                                                                                                                            |
|                                                                                   | <b>OR</b>                                             | <b>OR</b>                                                                       |                                                                                                                                                                                                                                                                                                                                                                                                               |
|                                                                                   | Evidence of SARS-CoV-2-specific intrathecal antibody; | Evidence of SARS-CoV-2-specific antibody in serum indicating acute infection+§; | In the context of known community SARS-CoV-2 transmission, supportive features* include:<br><br><i>Clinical:</i> new onset of least one of: cough, fever, shortness of breath, muscle aches, loss of smell, loss of taste;<br><br><i>Laboratory:</i> lymphopenia, raised d-dimer;<br><br><i>Radiological:</i> evidence of abnormalities consistent with infection or inflammation (e.g. ground glass changes) |
|                                                                                   | <b>AND</b>                                            | <b>AND</b>                                                                      |                                                                                                                                                                                                                                                                                                                                                                                                               |
| 2. No other explanatory pathogen or cause found                                   | 2. No other explanatory pathogen or cause found       |                                                                                 |                                                                                                                                                                                                                                                                                                                                                                                                               |

|                                                                                           | Strong association                                 | Probable association                                            | Possible association                                            |
|-------------------------------------------------------------------------------------------|----------------------------------------------------|-----------------------------------------------------------------|-----------------------------------------------------------------|
| <b>Acute disseminated encephalomyelitis** (ADEM) associated with SARS-CoV-2 infection</b> |                                                    | 1. Neurological disease onset <= 6 weeks after acute infection, | 1. Neurological disease onset <= 6 weeks after acute infection, |
|                                                                                           |                                                    | <b>AND</b>                                                      | <b>AND</b>                                                      |
|                                                                                           |                                                    | 2. SARS-CoV-2 RNA detected in any sample,                       | 2. SARS-CoV-2 RNA detected in any sample;                       |
|                                                                                           |                                                    | <b>OR</b>                                                       | <b>OR</b>                                                       |
|                                                                                           | Antibody evidence of acute SARS-CoV-2 infection;   | Antibody evidence of acute SARS-CoV-2 infection;                |                                                                 |
|                                                                                           | <b>AND</b>                                         | <b>AND</b>                                                      | <b>AND</b>                                                      |
|                                                                                           | 3. No evidence of other commonly associated causes | 3. No evidence of other commonly associated causes              | 3. Evidence of other commonly associated causes                 |

| Strong association                                                                                 | Probable association                                                                                                                                                                                                                                                              | Possible association                                                                                                                                                                                                                                                           |
|----------------------------------------------------------------------------------------------------|-----------------------------------------------------------------------------------------------------------------------------------------------------------------------------------------------------------------------------------------------------------------------------------|--------------------------------------------------------------------------------------------------------------------------------------------------------------------------------------------------------------------------------------------------------------------------------|
| <b>Guillain-Barré syndrome** and other acute neuropathies associated with SARS-CoV-2 infection</b> | 1. Neurological disease onset <= 6 weeks after acute infection,<br><br><b>AND</b><br><br>2. SARS-CoV-2 RNA detected in any sample;<br><b>OR</b><br>Antibody evidence of acute SARS-CoV-2 infection;<br><br><b>AND</b><br><br>3. No evidence of other commonly associated causes ¶ | 1. Neurological disease onset <= 6 weeks after acute infection,<br><br><b>AND</b><br><br>2. SARS-CoV-2 RNA detected in any sample;<br><b>OR</b><br>Antibody evidence of acute SARS-CoV-2 infection;<br><br><b>AND</b><br><br>3. Evidence of other commonly associated causes ¶ |
| <b>Stroke** associated with SARS-CoV-2 infection</b>                                               | 1. SARS-CoV-2 detected in CSF or other sample †;<br><br><b>OR</b><br>Evidence of SARS-CoV-2-specific antibody in serum indicating acute infection;<br><br><b>AND</b><br><br>2. No other known traditional cardiovascular risk factors ¥                                           | 1. SARS-CoV-2 detected in CSF or other sample;<br><br><b>OR</b><br>Evidence of SARS-CoV-2-specific antibody indicating acute infection;<br><br><b>AND</b><br><br>2. Other traditional cardiovascular risk factors ¥                                                            |

\*These case definitions are suggestions based on published information to date; they are likely to need refining as more data emerge.

† detection in CSF or brain tissue by PCR, culture, or immunohistochemistry, as appropriate; ‡ detection in non-CNS sample by PCR or culture. § Serological evidence of acute infection can be defined as i) detection of IgM, or ii) IgG seroconversion or iii) >=4-fold rise in antibody titres in paired acute and convalescent serum samples. ¶ These include: infection with one of *Campylobacter jejuni*, *Mycoplasma pneumoniae*, Cytomegalovirus (CMV), Epstein–Barr virus (EBV), hepatitis E virus, Zika virus, and HIV; or vaccination in the last 6 weeks. Associated causes may differ depending on geographical location. ¥ traditional cardiovascular risk factors include; hypertension, current smoker, diabetes, hypercholesterolemia, and atrial fibrillation.

The terms ‘confirmed’, ‘probable’ and ‘suspected’ are used in the WHO COVID-19 case definition. The terms ‘confirmed’, ‘probable’ and ‘possible’ for COVID-19 meningitis, encephalitis or myelitis and ‘strong association’, ‘probable association’, ‘possible association’ reflect the terminology used for the different syndromes in the original publications from which this table derives (see table references).

### References

1. Granerod J, Cunningham R, Zuckerman M, et al. Causality in acute encephalitis: defining aetiologies. *Epidemiol Infect* 2010. DOI:10.1017/s0950268810000725.
2. Solomon T, Dung NM, Vaughn DW, et al. Neurological manifestations of dengue infection. *Lancet* 2000; 355: 1053–9.
3. Mehta R et al. The spectrum of neurological disease associated with Zika and chikungunya viruses in adults in Rio de Janeiro, Brazil: A case series. *PLoS Negl Trop Dis* 2018; 12: e0006212.
